# Supplementary material for: Gender disparities in the association between epicardial adipose tissue volume and coronary atherosclerosis: A 3-dimensional cardiac computed tomography imaging study in Japanese subjects
Source: Cardiovasc Diabetol. 2012 Sep 10;11:106. doi: 10.1186/1475-2840-11-106 (PMC3489699; doi:10.1186/1475-2840-11-106)
Supplement: Additional file 1 — Characteristics of the study population after divided to <65 years or to ≥65 years. [file 1475-2840-11-106-S1.pdf]

**Supplement 1. Characteristics of the study population after divided to <65 years or to ≥65 years**

|                                                | Men         |             |         |             |             |         | Women       |             |       |             |             |    |
|------------------------------------------------|-------------|-------------|---------|-------------|-------------|---------|-------------|-------------|-------|-------------|-------------|----|
|                                                | <65 years   |             |         | ≥65 years   |             |         | <65 years   |             |       | ≥65 years   |             |    |
|                                                | non-CAD     | CAD         | P       | non-CAD     | CAD         | P       | non-CAD     | CAD         | P     | non-CAD     | CAD         | P  |
| Patient, n                                     | 20          | 9           |         | 5           | 13          |         | 13          | 7           |       | 14          | 9           |    |
| Age (years)                                    | 52 ± 12     | 58 ± 6      | ns      | 72 ± 3      | 73 ± 5      | ns      | 57 ± 5      | 53 ± 10     | ns    | 74 ± 7      | 75 ± 6      | ns |
| Body weight (kg)                               | 69.7 ± 10.7 | 69.0 ± 12.4 | ns      | 58.4 ± 3.1  | 62.3 ± 2.1  | ns      | 59.8 ± 6.5  | 54.3 ± 9.2  | ns    | 50.8 ± 7.9  | 49.0 ± 9.6  | ns |
| Body mass index (kg/m <sup>2</sup> )           | 25.0 ± 4.4  | 24.6 ± 2.2  | ns      | 21.0 ± 2.8  | 23.3 ± 1.8  | ns      | 24.8 ± 2.4  | 22.3 ± 4.3  | 0.039 | 22.9 ± 3.2  | 22.2 ± 4.2  | ns |
| Systolic blood pressure (mmHg)                 | 134 ± 18    | 133 ± 16    | ns      | 142 ± 11    | 130 ± 8     | 0.028   | 128 ± 17    | 118 ± 8.5   | ns    | 135 ± 10    | 144 ± 23.8  | ns |
| Diastolic blood pressure (mmHg)                | 75 ± 8      | 75 ± 11     | ns      | 77 ± 4.6    | 78 ± 7.1    | ns      | 77 ± 7      | 72 ± 4      | ns    | 77 ± 5      | 80 ± 5.0    | ns |
| LDL-cholesterol (mmol/L)                       | 2.47 ± 0.46 | 2.72 ± 0.57 | ns      | 2.48 ± 0.33 | 2.52 ± 0.61 | ns      | 3.41 ± 0.25 | 2.91 ± 0.90 | ns    | 2.78 ± 0.48 | 2.79 ± 0.73 | ns |
| HDL-cholesterol (mmol/L)                       | 1.19 ± 0.39 | 0.96 ± 0.15 | ns      | 1.07 ± 0.18 | 0.99 ± 0.18 | ns      | 1.90 ± 0.48 | 1.06 ± 0.04 | ns    | 1.52 ± 0.54 | 1.62 ± 0.60 | ns |
| Triglyceride (mmol/L)                          | 1.46 ± 0.55 | 1.76 ± 0.89 | ns      | 1.04 ± 0.51 | 1.78 ± 0.48 | ns      | 1.57 ± 0.14 | 1.78 ± 0.31 | ns    | 1.24 ± 0.67 | 1.24 ± 0.66 | ns |
| HbA <sub>1c</sub> (NGSP %)                     | 6.03 ± 0.32 | 7.47 ± 2.38 | ns      | 5.98 ± 0.70 | 7.32 ± 1.63 | ns      | 5.87 ± 0.21 | -           | ns    | 6.61 ± 1.26 | 5.75 ± 0.67 | ns |
| Hypertension (%)                               | 61          | 75          | ns      | 67          | 85          | ns      | 55          | 0           | ns    | 60          | 75          | ns |
| Diabetes mellitus (%)                          | 28          | 50          | ns      | 50          | 46          | ns      | 0           | 50          | ns    | 20          | 25          | ns |
| Hyperlipidemia (%)                             | 85          | 83          | ns      | 60          | 92          | ns      | 80          | 50          | ns    | 78          | 0           | ns |
| EATV (cm <sup>3</sup> )                        | 61 ± 20     | 109 ± 27    | <0.0001 | 43 ± 21     | 104 ± 20    | <0.001  | 64 ± 15     | 64 ± 24     | ns    | 60 ± 13     | 72 ± 33     | ns |
| EATV/height (cm <sup>3</sup> /m <sup>2</sup> ) | 65 ± 16     | 37 ± 12     | <0.0001 | 26 ± 12     | 64 ± 12     | <0.0001 | 41 ± 17     | 41 ± 19     | ns    | 41 ± 9      | 47 ± 20     | ns |
| EATV/BSA (cm <sup>3</sup> /m <sup>2</sup> )    | 34 ± 10     | 61 ± 16     | <0.0001 | 28 ± 12     | 62 ± 11     | <0.001  | 41 ± 10     | 43 ± 11     | ns    | 42 ± 9      | 55 ± 21     | ns |

Values are means ± SD. P values vs Non-CAD. ns: not significant. CAD: coronary artery disease; LDL: low density lipoprotein; HDL: High density lipoprotein; HbA<sub>1c</sub>: Glycosylated hemoglobin, NGSP: National Glycohemoglobin Standardization Program, EATV: epicardial adipose tissue volume, BSA: body surface area.
